# Supplementary material for: Development of a core outcome set for clinical trials in childhood asthma: a survey of clinicians, parents, and young people
Source: Trials. 2012 Jul 2;13:103. doi: 10.1186/1745-6215-13-103 (PMC3433381; doi:10.1186/1745-6215-13-103)
Supplement: Additional file 1 — List of clinicians who participated in the Delphi process (shown with consent from each participant). [file 1745-6215-13-103-S1.pdf]

### **Additional File 1 - List of clinicians who participated in Round 1 of the Delphi process**

| <b>Name</b>         | <b>Job title</b>                                   | <b>Institution</b>                                   |
|---------------------|----------------------------------------------------|------------------------------------------------------|
| Ian Balfour-Lynn    | Consultant respiratory paediatrician               | Royal Brompton Hospital                              |
| Jayesh M Bhatt      | Consultant respiratory paediatrician               | Nottingham University Hospitals                      |
| Cara Bossley        | Clinical Research Fellow                           | Royal Brompton Hospital                              |
| Hannah Buckley      | Consultant paediatrician                           | Portsmouth Hospitals NHS Trust                       |
| Fran Child          | Consultant respiratory paediatrician               | Royal Manchester Childrens' Hospital                 |
| Jayne Clarke        | Consultant paediatrician with respiratory interest | Hereford County Hospital                             |
| Sadie Clayton       | Senior paediatric respiratory nurse                | University Hospital North Staffordshire              |
| Gary Connett        | Consultant paediatrician                           | Southampton University Hospitals Trust               |
| Donna Corrigan      | Consultant paediatrician with respiratory interest | Wishaw General Hospital                              |
| Jon Couriel         | Consultant respiratory paediatrician               | Alder Hey Children's Hospital                        |
| Margaret Cuffwright | Specialist health visitor – paediatric asthma      | Salford PCT/Central Manchester Foundation trust      |
| Suparna Dasgupta    | Consultant paediatrician                           | North Manchester General Hospital                    |
| Anne Devenney       | Consultant respiratory paediatrician               | Royal Hospital for Sick Children (Yorkhill), Glasgow |
| Amanda Equi         | Consultant paediatrician with respiratory interest | West Hertfordshire NHS Trust                         |
| Hazel Evans         | Consultant respiratory paediatrician               | Childrens Hospital for Wales                         |
| Debra Forster       | Childrens' respiratory nurse                       | Nottingham University Hospitals                      |
| John Furness        | Consultant paediatrician                           | County Durham & Darlington NHS Foundation Trust      |
| Jonathan Garside    | Consultant paediatrician                           | Calderdale and Huddersfield NHS Foundation Trust     |
| Neil Gibson         | Consultant respiratory paediatrician               | Royal Hospital for Sick Children (Yorkhill), Glasgow |
| Charles Godden      | Consultant paediatrician                           | Royal Surrey County Hospital                         |
| Ajay Gupta          | Consultant paediatrician                           | Stafford General Hospital                            |
| Peter J Helms       | Professor of Child Health                          | University of Aberdeen                               |
| Sheila Javadpour    | Consultant respiratory paediatrician               | Alder Hey Children's Hospital, Liverpool             |
| Helen Jones         | Specialist Nurse                                   | St George's NHS Trust                                |

|                      |                                                                                |                                                                 |
|----------------------|--------------------------------------------------------------------------------|-----------------------------------------------------------------|
| Tim Lee              | Consultant respiratory paediatrician                                           | St James' Hospital, Leeds                                       |
| Warren Lenney        | Professor of Respiratory Child Health and Consultant Respiratory Paediatrician | Keele University and University Hospital of North Staffordshire |
| BG Loftus            | Professor of paediatrics                                                       | NUI Galway                                                      |
| Anirban Maitra       | Specialist Registrar in Respiratory Paediatrics                                | Sheffield Children's Hospital                                   |
| Melanie McFeeters    | Consultant nurse                                                               | University Hospitals Leicester NHS Trust                        |
| Godfrey Nyamugunduru | Consultant paediatrician                                                       | University Hospital of North Durham                             |
| Sheila Peters        | Consultant paediatrician                                                       | Portsmouth Hospitals NHS Trust                                  |
| Ian Pollock          | Consultant paediatrician                                                       | Chase Farm Hospital                                             |
| Robert Primhak       | Consultant respiratory paediatrician                                           | Sheffield Children's Hospital                                   |
| Rosemary Rayner      | Consultant paediatrician                                                       | New Cross Hospital, Wolverhampton                               |
| Robert Ross Russell  | Consultant in PICU and Respiratory Paediatrics                                 | Addenbrooke's Hospital, Cambridge                               |
| Martin Samuels       | Consultant paediatrician                                                       | University Hospital North Staffordshire                         |
| MG Semple            | Senior Lecture and Consultant in Paediatric Respiratory Medicine               | Alder Hey Children's Hospital                                   |
| Michael D Shields    | Professor of Child Health                                                      | Royal Belfast Hospital for Sick Children                        |
| David Spencer        | Consultant respiratory paediatrician                                           | Newcastle Hospitals                                             |
| Anne Thomson         | Consultant respiratory paediatrician                                           | Oxford Childrens' Hospital                                      |
| Steve Turner         | Senior lecturer                                                                | University of Aberdeen                                          |
| Chris Upton          | Consultant paediatrician                                                       | Norfolk & Norwich University Hospital                           |
| Lynette Williams     | Paediatric respiratory nurse specialist                                        | Shrewsbury and Telford NHS trust                                |
| Nicola Wilson        | Honorary consultant in respiratory paediatrics                                 | Royal Brompton Hospital                                         |
| Edwina Wooler        | Senior paediatric respiratory nurse specialist                                 | Royal Alexandra Children's Hospital, Brighton                   |
| Caroline Youle       | Respiratory nurse specialist                                                   | Nottingham University Hospital                                  |
